# Supplementary material for: Suitable concentrations of brassinolide application enhances growth performance and saikosaponin biosynthesis by transcriptional activation of triterpenoid pathway genes in Bupleurum chinense DC
Source: Front Plant Sci. 2025 Mar 31;16:1517434. doi: 10.3389/fpls.2025.1517434 (PMC11994733; doi:10.3389/fpls.2025.1517434)
Supplement: Supplementary file 3 [file Table3.xlsx]

## Sheet: Sheet1
Index	Formula	Compounds	Class I	Class II	CAS	Level	Treat-1	Treat-2	Treat-3	CK-1	CK-2	CK-3	VIP	P-value	FDR	Fold_Change	Log2FC
mws2198	C49H82O18	11(α)-Methoxysaikosaponin F	Terpenoids	Triterpene Saponin	104109-37-7	3	22091.6	19993	22084.5	11684.6	10622.3	10038	1.16294	0.000460131	0.00384726	1.98391	0.988347
Hmqp005412	C20H30O3	12-Hydroxyabietic Acid	Terpenoids	Ditepenoids	3484-61-5	3	55126.2	77761.2	40840.8	60368.7	58314.1	63043.5	0.230351	0.827952	0.850636	0.955989	-0.0649345
pmn001331	C42H66O13	16-Keto-saikosaponin A	Terpenoids	Triterpene Saponin	-	3	71451.9	70539.7	67367.5	51178.3	50189.2	67363.5	0.904863	0.129489	0.161861	1.24079	0.311254
Lhcp102412	C48H78O18	2''-O-Glucosyl saikosaponin b2	Terpenoids	Triterpene Saponin	-	1	132366	153272	132174	92732.7	111113	92000.1	1.07332	0.0126819	0.0350478	1.41226	0.498006
Lmzn106284	C30H48O4	2,3-Dihydroxylup-20(29)-en-28-oic acid (Alphitolic acid)*	Terpenoids	Triterpene	19533-92-7	3	1.03045e+06	1.1866e+06	1.1634e+06	1.3381e+06	634893	608834	0.643474	0.381289	0.42054	1.30933	0.38883
Hmjn008136	C30H46O4	2,3-Dihydroxyoleana-11,13(18)-dien-28-oic acid (Camaldulenic acid)	Terpenoids	Triterpene	71850-15-2	3	128648	113969	126494	58595.5	142669	173722	0.143665	0.959953	0.959953	0.98433	-0.0227861
Zmpn008194	C30H48O4	2,3-Dihydroxyurs-12-en-28-oic acid (Corosolic acid)*	Terpenoids	Triterpene	4547-24-4	3	229883	191555	184374	304601	217886	281128	0.883075	0.108759	0.143104	0.753859	-0.407634
mws1610	C30H48O4	2,3-Dihydroxyurs-12-en-29-oic acid (Maslinic acid)*	Terpenoids	Triterpene	4373-41-5	3	228169	442820	337510	537957	403870	644754	0.819396	0.108626	0.143104	0.635643	-0.653712
Lhcp102413	C48H78O18	3,16,28,30-Tetrahydroxyolean-11,13(18)-dien-3-O-glucosyl(1→6)[rhamnosyl(1→4)glucoside]	Terpenoids	Triterpene Saponin	-	1	218354	238763	212184	156650	149181	125089	1.11323	0.00340798	0.016831	1.55319	0.635236
Lhdp102521	C36H58O9	3,9-Dihydroxyurs-12-ene-28-oic acid-28-glucosyl ester	Terpenoids	Triterpene Saponin	-	2	36354.4	42706.2	40905	32143.9	28506.8	32662	1.05849	0.0224631	0.046758	1.28563	0.362476
MWSmce595	C30H46O4	3-Hydroxy-11-oxours-12-en-23-oic acid (11-Keto-beta-boswellic acid)	Terpenoids	Triterpene	17019-92-0	3	44773.4	46067.6	43661.9	27064.1	25164	25348	1.17503	3.80234e-05	0.000950584	1.73382	0.793953
Ybhn010559	C29H46O4	3-Hydroxy-20-oxo-30-norlupan-28-oic acid (Platanic acid)	Terpenoids	Triterpene	6060-06-6	3	79439.1	81333.8	106605	28485.5	40909.7	42960.9	1.10798	0.0135518	0.0350478	2.37974	1.2508
MWSHC20176	C30H48O3	3-Hydroxylup-20(29)-en-28-oic acid (Betulinic acid)*	Terpenoids	Triterpene	472-15-1	3	184433	182194	183994	1.10402e+06	1.0471e+06	1.19554e+06	1.17854	0.00214056	0.0114673	0.164529	-2.60359
mws1389	C30H48O3	3-Hydroxyolean-12-en-28-oic acid (Oleanolic acid)*	Terpenoids	Triterpene	508-02-1	3	231636	228684	229638	799097	574870	857173	1.15128	0.0269304	0.0517892	0.30924	-1.6932
mws4053	C30H48O3	3-Hydroxyurs-12-en-28-oic acid (Ursolic acid)*	Terpenoids	Triterpene	77-52-1	3	191897	185496	184436	1.09437e+06	1.00116e+06	1.12261e+06	1.17872	0.00165109	0.0095255	0.174582	-2.51803
Lmxn007617	C48H76O19	3-O-Rhamnosyl(1→2)glucosyl-2,3-dihydroxy-23-oxoolean-l2-en-28-oic acid-28-O-glucosyl ester	Terpenoids	Triterpene Saponin	-	2	22205.7	22720.9	25724.9	110998	116094	120005	1.17782	0.000144001	0.00241953	0.203549	-2.29655
Zbbn002910	C36H38O16	6''-O-sinapoyl-7-O-caffeoyl-geniposide	Terpenoids	Monoterpenoids	-	1	465139	441428	370712	1.01644e+06	999260	957845	1.16446	0.000242499	0.00303123	0.429547	-1.21911
Lmdn001560	C15H22O9	6-DeoxyCatalpol	Terpenoids	Monoterpenoids	99499-99-7	1	67002.8	42084.8	32630.3	67187.6	56907.9	62973.1	0.705549	0.275443	0.313004	0.757572	-0.400546
Wbmn003453	C23H30O12	6-O-Vanilloylajugol	Terpenoids	Monoterpenoids	124168-04-3	3	873344	900311	869374	478209	471823	449003	1.17716	6.53254e-06	0.000462052	1.88918	0.917761
Lmjp003834	C25H30O12	6-O-p-Methoxycinnamoylcatalpol	Terpenoids	Monoterpenoids	121710-02-9	2	290992	279655	279290	142840	150189	138310	1.17487	1.23214e-05	0.000462052	1.97046	0.978535
Hmmn003964	C16H24O9	7-Deoxyloganic acid	Terpenoids	Monoterpenoids	22487-36-1	3	56999	57724.5	57292	221131	209570	222046	1.17931	0.000608285	0.00414739	0.263525	-1.92399
Sacn001940	C16H24O10	8-Epiloganic acid	Terpenoids	Monoterpenoids	82509-41-9	2	640452	618081	528505	463449	442518	437209	1.08219	0.0432751	0.069056	1.33046	0.411923
MWSslk186	C17H26O11	8-O-Acetylharpagide	Terpenoids	Monoterpenoids	6926-14-3	3	33242.9	46884.4	24938.5	33508.6	44004.7	46684.3	0.478536	0.454427	0.486886	0.845956	-0.241345
pmn001328	C44H70O14	Acetylsaikosaponin A	Terpenoids	Triterpene Saponin	102934-42-9	3	3.41303e+06	3.66038e+06	3.9014e+06	2.40429e+06	2.4306e+06	2.72237e+06	1.13506	0.00387719	0.0171052	1.45222	0.538262
pmn001326	C45H74O15	Acetylsaikosaponin B3	Terpenoids	Triterpene Saponin	-	3	139212	164801	146628	79837.4	78619.2	84500.9	1.16573	0.00892413	0.0273826	1.85482	0.891276
MWSmce661	C15H18O2	Atractylenolide I	Terpenoids	Sesquiterpenoids	73069-13-3	2	28603.6	32229.2	31508.6	17395.1	14697.6	14164.8	1.15557	0.000530241	0.00397681	1.99625	0.997292
Xmmn006031	C21H36O10	Borneol 7-O-[β-D-apiofuranosyl-(1→6)]-β-D-glucopyranoside	Terpenoids	Monoterpenoids	88700-35-0	1	3.99094e+06	3.96338e+06	3.83305e+06	4.71409e+06	4.36255e+06	4.45638e+06	1.10111	0.0175834	0.0399622	0.871008	-0.199242
Lamp005564	C21H36O10	Borneol-2-O-β-D-apiofuranosyl(1→6)-β-D-glucopyranoside	Terpenoids	Monoterpenoids	-	1	36118.4	30044.2	25462.1	50617.5	46060.2	45612.9	1.0685	0.0166276	0.0389709	0.643927	-0.63503
Zmcp102714	C48H78O18	3β, 16β, 23-trihydroxy-11-ene-13.28-epoxy-3β-oleanolyl - [β-D-glucopyrano - (1 → 2) ] - [β-D-glucopyrano - (1 → 3) -β-D-glucopyrano glycoside *(Bupleurumfruticosum*)	Terpenoids	Triterpene Saponin	-	1	164733	216723	136536	104579	120321	136090	0.893836	0.143643	0.176611	1.43492	0.520966
Zmcp102805	C48H78O17	3β, 16α, 28-trihydroxy-11,13 (18) -diene-3β-oleanolyl-β-D-glucopyranosyl- (1 → 6) -β-D- [α-L-pyranolinosyl- (1 → 4) ] -β-D-glucopyranolidoside *(Buplewrumpolyclonum*)	Terpenoids	Triterpene Saponin	-	1	320765	277042	316189	315711	278638	288379	0.315232	0.590377	0.623638	1.03542	0.0502188
Zmcp102713	C48H78O18	Buplewrumpolyelonum*	Terpenoids	Triterpene Saponin	-	1	187733	231048	182101	99631.5	125941	108399	1.11652	0.014921	0.0360991	1.7992	0.847359
Cmmn012461	C20H28O2	Dehydroabietic acid	Terpenoids	Ditepenoids	1740-19-8	3	4.62407e+06	4.35466e+06	4.22372e+06	3.9725e+06	3.82976e+06	3.79641e+06	1.06738	0.0294113	0.0538012	1.13827	0.186845
mws1626	C15H18O2	Dehydrocostuslactone	Terpenoids	Sesquiterpenoids	477-43-0	3	72116.8	76422.3	78501.7	45571.1	49143	39491.3	1.13883	0.00148067	0.00925416	1.69174	0.758508
Xmln005368	C13H18O3	Dehydrovomifoliol	Terpenoids	Monoterpenoids	15764-81-5	2	2.91549e+06	1.94744e+06	2.64245e+06	2.86766e+06	1.88805e+06	2.61211e+06	0.0647344	0.916588	0.928975	1.01867	0.0266878
MWSmce084	C14H16O3	Fraxinellone	Terpenoids	Sesquiterpenoids	28808-62-0	3	342867	365408	405058	234176	204847	234499	1.14411	0.00529309	0.0208938	1.653	0.725088
Lmdn001501	C16H22O10	Gardoside*	Terpenoids	Monoterpenoids	54835-76-6	2	561895	534644	468746	634701	582507	574615	0.873177	0.0959515	0.13578	0.873571	-0.195003
mws1574	C16H22O10	Geniposidic acid*	Terpenoids	Monoterpenoids	27741-01-1	2	528225	493861	446988	629045	603860	595464	1.07183	0.0230673	0.046758	0.80349	-0.315648
MWSslk157	C17H24O11	Hastatoside	Terpenoids	Monoterpenoids	50816-24-5	3	54674.2	50507	53665.6	43014.5	35448.6	38723.6	1.09751	0.0100857	0.0290934	1.3555	0.438828
Zaxn006988	C20H30O2	Isopimaric acid*	Terpenoids	Ditepenoids	5835-26-7	2	1.52073e+07	1.276e+07	1.28854e+07	1.32084e+07	1.17278e+07	1.21089e+07	0.680399	0.254217	0.293327	1.10278	0.141149
MWSslk208	C20H30O2	Kaurenoic Acid*	Terpenoids	Ditepenoids	6730-83-2	2	1.44965e+07	1.2755e+07	1.24595e+07	1.26413e+07	1.15169e+07	1.19017e+07	0.77297	0.187592	0.223324	1.10125	0.139141
Cmrn001591	C16H24O10	Mussaenosidic acid	Terpenoids	Monoterpenoids	82451-22-7	2	119379	56142.6	56654.2	136890	129267	127058	0.907378	0.122206	0.155347	0.590458	-0.760094
Lmyp004084	C10H16O	Perillyl alcohol	Terpenoids	Monoterpenoids	57717-97-2	2	459900	485779	406833	653343	635931	613716	1.12173	0.00632889	0.0226032	0.71073	-0.492627
Laxp004658	C15H20O5	Phaseic Acid	Terpenoids	Sesquiterpenoids	24394-14-7	1	212238	216352	202720	199606	168473	190513	0.899902	0.103885	0.143104	1.13018	0.176556
Lmbn014696	C20H30O2	Pimaric acid*	Terpenoids	Ditepenoids	127-27-5	2	1.52617e+07	1.32131e+07	1.32757e+07	1.33227e+07	1.20838e+07	1.23402e+07	0.779895	0.177758	0.21503	1.10607	0.145446
Zmcp102607	C36H58O8	Prosaikogenin F	Terpenoids	Triterpene Saponin	-	1	351341	321190	323481	268189	247215	241992	1.12424	0.00359061	0.016831	1.31505	0.395115
Lhcp102425	C36H58O8	Prosaikogenin G	Terpenoids	Triterpene Saponin	-	1	213932	204016	240511	190048	201335	175779	0.889897	0.0909214	0.132673	1.16097	0.215336
Zmcp102701	C48H80O17	Rotundifolioside C*	Terpenoids	Triterpene Saponin	-	1	457666	477068	522599	403293	374287	374068	1.09705	0.0185423	0.0409021	1.26543	0.33963
Zmcp102802	C30H48O5	Saikogenin Q	Terpenoids	Triterpene	-	1	1.44609e+06	1.31707e+06	1.494e+06	982327	1.01682e+06	1.09723e+06	1.12535	0.00583855	0.0218946	1.37488	0.459309
Lhcp102421	C42H68O13	Saikosapanin B1	Terpenoids	Triterpene Saponin	-	2	675911	814174	707126	473248	499385	390253	1.09816	0.00744054	0.0253655	1.61217	0.689008
Lhcp102418	C42H68O13	Saikosaponin A*	Terpenoids	Triterpene Saponin	20736-09-8	1	4.18851e+06	3.86676e+06	4.32663e+06	3.45047e+06	3.82752e+06	3.46892e+06	0.969812	0.0416134	0.0678479	1.15213	0.204309
mws2192	C42H68O13	Saikosaponin B1	Terpenoids	Triterpene Saponin	58558-08-0	3	2.17391e+07	2.03924e+07	2.15147e+07	1.51997e+07	1.50925e+07	1.52583e+07	1.17044	0.00430257	0.0179274	1.39727	0.482609
Lhcp102420	C42H68O13	Saikosaponin B2*	Terpenoids	Triterpene Saponin	58316-41-9	1	554917	487289	311278	322514	280812	333762	0.809833	0.191551	0.224474	1.44435	0.530419
mws2194	C43H72O14	Saikosaponin B3*	Terpenoids	Triterpene Saponin	58316-42-0	3	1.71348e+06	2.21016e+06	1.74222e+06	1.23095e+06	1.19402e+06	1.26206e+06	1.10388	0.052785	0.0824766	1.5367	0.619835
mws2187	C43H72O14	Saikosaponin B4*	Terpenoids	Triterpene Saponin	58558-09-1	3	1.9876e+06	2.23006e+06	1.69697e+06	1.36543e+06	1.07719e+06	1.21372e+06	1.08692	0.0220277	0.046758	1.61763	0.693883
Zmcp102803	C48H78O17	Saikosaponin BK1*	Terpenoids	Triterpene Saponin	110352-77-7	1	287423	339467	298623	282844	226143	253788	0.913916	0.0758026	0.11433	1.21335	0.278996
MWSprf082	C48H78O17	Saikosaponin C*	Terpenoids	Triterpene Saponin	20736-08-7	1	280907	279114	264160	292347	244513	201159	0.564712	0.389712	0.4236	1.11675	0.159302
Lhcp102419	C42H68O13	Saikosaponin D	Terpenoids	Triterpene Saponin	20874-52-6	1	1.59876e+06	1.34738e+06	1.53517e+06	1.25224e+06	1.10277e+06	1.20386e+06	1.02855	0.034778	0.0606593	1.2592	0.332502
Zmcp102707	C42H68O12	Saikosaponin E	Terpenoids	Triterpene Saponin	64340-44-9	1	177518	194347	177658	153019	132739	146683	1.09107	0.00898036	0.0273826	1.27075	0.345675
Lhcp102414	C48H80O17	Saikosaponin F*	Terpenoids	Triterpene Saponin	62687-63-2	1	417321	351947	484454	347456	349241	261590	0.826603	0.114439	0.147982	1.30829	0.387687
mws2191	C42H68O13	Saikosaponin G	Terpenoids	Triterpene Saponin	99365-19-2	3	6.63391e+06	6.28798e+06	6.46431e+06	3.94422e+06	4.48389e+06	4.98768e+06	1.10733	0.0147935	0.0360991	1.44503	0.531098
mws2196	C48H78O17	Saikosaponin H	Terpenoids	Triterpene Saponin	91990-63-5	3	566163	564395	593835	424758	344853	451510	1.07299	0.0266253	0.0517892	1.41214	0.497882
mws2197	C48H78O17	Saikosaponin I	Terpenoids	Triterpene Saponin	103629-71-6	3	987630	959778	792997	673197	613548	698510	1.06268	0.0385627	0.0646969	1.38038	0.465065
Zmcp102709	C42H68O14	Saikosaponin L	Terpenoids	Triterpene Saponin	-	1	16070	21234.7	26486.4	17740.6	16851.8	16010.1	0.689931	0.279842	0.313256	1.26063	0.334143
Lhcp102423	C42H68O12	Saikosaponin M	Terpenoids	Triterpene Saponin	-	2	73186.6	60336.5	72857.2	53235.1	43682.8	54665.6	1.00636	0.0304226	0.054326	1.3615	0.445193
Zmcp102710	C48H78O18	Saikosaponin N*	Terpenoids	Triterpene Saponin	161068-50-4	1	129160	148995	121827	97535.1	117519	111107	0.925726	0.0762198	0.11433	1.22633	0.294352
Zmcp102711	C48H78O18	Saikosaponin S*	Terpenoids	Triterpene Saponin	-	1	130975	185241	134731	89918.4	121084	105814	0.922309	0.108012	0.143104	1.42337	0.509308
Zmcp102806	C47H74O18	Saikosaponin S1	Terpenoids	Triterpene Saponin	-	1	266262	317993	279061	337589	338886	315837	0.909359	0.0919866	0.132673	0.870005	-0.200905
Zmcp102807	C53H86O24	Saikosaponin V*	Terpenoids	Triterpene Saponin	-	1	35687.1	37130.1	53717.4	15719.4	9835.6	16086.3	1.11043	0.0285848	0.0535964	3.03869	1.60345
Zmcp102712	C42H66O15	Saikosaponin X	Terpenoids	Triterpene Saponin	-	3	445326	389122	418720	83492.7	120932	131375	1.15335	0.000161302	0.00241953	3.73189	1.8999
Zmcp102808	C53H86O24	Scorzoneroside A*	Terpenoids	Triterpene Saponin	-	1	73494.3	68336.9	72935	26197.4	18541	27227	1.15432	0.000409247	0.00384726	2.9843	1.57739
HX1227	C15H22O	Selina-3,7(11)-dien-8-one	Terpenoids	Monoterpenoids	-	2	30160.7	34967.7	35554	6785.05	4590.71	8401.58	1.15615	0.000461671	0.00384726	5.0908	2.34789
Zmcp102603	C46H72O15	diacetylsaikosaponin B2	Terpenoids	Triterpene Saponin	-	1	267255	326246	345303	141054	126086	125632	1.15866	0.0131727	0.0350478	2.3902	1.25713
Lmzp003064	C16H28O7	p-Menth-1-ene-3,6-diol-3-O-β-D-glucoside	Terpenoids	Monoterpenoids	-	2	151823	110341	78455	112326	106818	141414	0.230995	0.798402	0.831668	0.944699	-0.082074
Lmdn005219	C18H30O8	p-Menth-4(5)-ene-1,2-diol-1-O-β-D-(2-O-acetyl)-glucoside	Terpenoids	Monoterpenoids	-	1	484133	488821	484219	631219	646217	599004	1.16432	0.00912752	0.0273826	0.776563	-0.364825
Zmcp102606	C48H78O19	pentahydroxyolean	Terpenoids	Triterpene Saponin	-	3	90920.8	131867	101911	49138	49794.7	57888.1	1.12397	0.0388181	0.0646969	2.07051	1.04998
